# Supplementary material
Source: HighWire-hosted journal article supplement (https://www.cmajopen.ca/highwire/filestream/87804/field_highwire_adjunct_files/1/open-2021-0031-original-submission.pdf)
Supplement: open-2021-0031-original-submission.pdf [file open-2021-0031-original-submission.pdf]

1  
2  
3 **Derivation and Validation of a Clinical Model to Predict**  
4  
5 **Death on the Waitlist for Cardiac Surgery**  
6  
7

8  
9 Louise Y. Sun, MD, SM; Harindra C. Wijeyesundera, MD, PhD; Douglas S. Lee, MD, PhD; Sean van  
10 Diepen, MD, MSc; Marc Ruel, MD, MPH; Anan Bader Eddeen, MSc; Thierry G. Mesana, MD, PhD  
11  
12

13  
14 From the Division of Cardiac Anesthesiology, University of Ottawa Heart Institute and the School of  
15 Epidemiology and Public Health, University of Ottawa, Ontario, Canada (LYS); Institute for Clinical  
16 Evaluative Sciences (LYS, HCW, DSL, ABE); Schulich Heart Program, Sunnybrook Health Sciences  
17 Centre; Division of Cardiology, Department of Medicine and Institute for Health Policy, Management  
18 and Evaluation, University of Toronto, Ontario, Canada (HCW); Peter Munk Cardiac Centre, University  
19 Health Network, University of Toronto, Ontario, Canada (DSL); Department of Critical Care and  
20 Division of Cardiology, Department of Medicine, University of Alberta, Edmonton, Canada (SvD); and  
21 the Division of Cardiac Surgery, University of Ottawa Heart Institute, Ontario, Canada (MR, TGM).  
22  
23  
24  
25  
26  
27  
28  
29  
30  
31  
32  
33

34 **Address for Correspondence:**  
35

36 Louise Y. Sun, MD, SM, FRCPC, FAHA  
37

38 Clinician Scientist and Associate Professor  
39

40 Room H2410, 40 Ruskin Street, Ottawa, ON, Canada K1Y 4W7  
41

42 Phone: 1 613 696 7381 Facsimile: 1 613 696 7099  
43

44 Email: [lsun@ottawaheart.ca](mailto:lsun@ottawaheart.ca)  
45  
46  
47  
48  
49

50 **Word Count:** 2653  
51

52  
53  
54 **Short Title:** Predicting Death on Cardiac Surgery Waitlists  
55  
56  
57  
58

1  
2  
3  
4  
5  
6 **Funding:** This study was supported by an innovations grant from the Ontario Ministry of Health and  
7  
8 Long-Term Care (MOHLTC). LYS was named National New Investigator by the Heart and Stroke  
9  
10 Foundation of Canada and is supported by a Tier 2 Clinical Research Chair in Big Data and  
11  
12 Cardiovascular Outcomes at the University of Ottawa. HCW is supported by a Phase 2 Clinician-  
13  
14 Scientist award from the Heart and Stroke Foundation of Canada, Ontario Office. DSL is supported by a  
15  
16 Mid-Career Investigator Award from the Heart and Stroke Foundation. MR and TGM are supported by  
17  
18 endowed research chairs at the UOHI. This study is also supported by ICES, which is funded by an  
19  
20 annual grant from the MOHLTC. The authors acknowledge that the clinical registry data used in this  
21  
22 analysis is from participating hospitals through CorHealth Ontario, which serves as an advisory body to  
23  
24 the MOHLTC, is funded by the MOHLTC, and is dedicated to improving the quality, efficiency, access,  
25  
26 and equity in the delivery of the continuum of adult cardiac and stroke care in Ontario, Canada. The  
27  
28 funders have no role in the design and conduct of the study; collection, management, analysis, and  
29  
30 interpretation of the data; preparation, review, nor approval of the manuscript; nor decision to submit the  
31  
32 manuscript for publication.  
33  
34  
35  
36  
37  
38  
39

40 **Acknowledgments:** The authors acknowledge the usage of data compiled and provided by the Canadian  
41  
42 Institute for Health Information. These datasets were linked using unique encoded identifiers and  
43  
44 analyzed at ICES. The analyses, conclusions, opinions, and statements expressed in the manuscript are  
45  
46 those of the authors and do not necessarily reflect those of the above agencies.  
47  
48  
49  
50

51 **Declaration of Interests:** none  
52  
53  
54  
55  
56  
57  
58  
59  
60

## ABSTRACT

**Background:** The COVID-19 pandemic has led to a global surgical backlog. This delay in access to care has resulted in unintended harm to cardiac surgery patients, who are at risk of mortality if their conditions are left untreated. To facilitate evidence-based resource allocation, we derived and validated a clinical risk score to predict death on the waitlist in patients referred for cardiac surgery.

**Methods:** We used the CorHealth Ontario Registry and linked ICES healthcare administrative databases with information on all Ontario residents. Included were patients  $\geq 18$  years of age who were referred for coronary artery bypass grafting, valvular, and/or thoracic aorta surgeries between October 1, 2008 and September 30, 2019. We used a hybrid modelling approach with Random Forests for initial variable selection, followed by backward stepwise logistic regression modelling for clinical interpretability and parsimony. We internally validated this model, termed the “CardiOttawa Waitlist Mortality Score”, using 200 bootstraps.

**Results:** There were 269 (0.24%) waitlist deaths amongst 112,266 referrals. The model discriminated (c-statistic 0.76; 0.73 after optimism correction) and calibrated well in the overall cohort (Hosmer-Lemeshow p-value = 0.22) and across each type of surgery.

**Interpretation:** The CardiOttawa Waitlist Mortality Score is a simple clinical risk model that predicts the likelihood of waitlist death in patients awaiting cardiac surgery. It can be combined with the CardiOttawa Length of Stay Score to provide rapid, data-driven decision support for managing access to cardiac care and preserve system capacity during the COVID-19 crisis, the recovery period, and beyond.

**Key Words:** cardiac surgery, waitlist, mortality, access to care, COVID-19

## INTRODUCTION

The coronavirus disease (COVID-19), which was declared a pandemic by the World Health Organization on March 11, 2020, has precipitated a health care crisis that disrupted the care of patients with cardiovascular conditions. Non-emergent cardiac procedures were deferred amidst the first wave of this crisis to ensure that sufficient resources were available to treat patients with COVID-19 (1), creating surgical backlogs around the globe (2).

This growing surgical backlog of patients with advanced cardiac disease creates a dilemma for clinicians and administrators, as these patients require monitoring in the intensive care unit (ICU) after surgery and may potentially compete with the resource needs of those with severe COVID-19 infection. Our group recently developed and validated the CardiOttawa Length of Stay (LOS) Score as an evidenced-based decision support tool to identify high and low ICU resource users after cardiac surgery (3). However, safe triage decision-making goes beyond knowing patients' postoperative health care resource needs; it requires an accurate estimation of the risks they will face in waiting for surgery. Published waitlist risk models are limited to specific populations such as patients undergoing coronary artery bypass grafting (CABG) (4) and cardiac transplantation (5). The only population-based study of waitlist deaths included a small number of events and was focused on the identification of risk factors rather than the prediction of risk (6). Consequently, current recommendations for waitlist management were developed based on expert opinion rather than clinical evidence. We conducted a population-based study in Ontario, Canada to derive and validate a clinical model to predict death on the waitlist for patients who were referred for cardiac surgery.

## METHODS

LYS and ABE had full access to all the data in the study and take responsibility for its integrity and the data analysis. The dataset from this study is held securely in coded form at ICES (formerly the Institutes for Clinical Evaluative Sciences). The use of data was authorized under section 45 of Ontario's *Personal Health Information Protection Act*, which does not require review by a research ethics board (7).

### Design and Population

We conducted a population-based, retrospective cohort study of adult patients  $\geq 18$  years of age, who were waitlisted for CABG; and/or valvular surgery; as well as surgery on the thoracic aorta in Ontario between October 1, 2008, and September 30, 2019. Excluded were patients who were waitlisted for transcatheter procedures, cardiac transplantation, or implantation of ventricular assist devices; as well as those requiring salvage procedures. For patients with multiple cardiac procedures during the study period, only the index procedure was included in the analysis.

### Data Source

We used the clinical registry of CorHealth Ontario and population-level administrative healthcare databases available at ICES. CorHealth Ontario maintains a detailed prospective registry of all patients who undergo invasive cardiac procedures in Ontario, including demographic, comorbidity, and procedure-related information. CorHealth Ontario data undergo selected chart audits and core laboratory validation (3, 7-15).

Using unique confidential identifiers, we linked the CorHealth Ontario registry (detailed surgical referral and waitlist data, date and type of cardiac procedures, physiologic and comorbidity data) with

1  
2  
3 the Canadian Institute for Health Information Discharge Abstract Database (DAD; comorbidities,  
4 hospital admissions, and in-hospital procedures), the Ontario Health Insurance Plan (OHIP) database  
5 (physician service claims) and the Registered Persons Database (RPDB; vital statistics). These  
6 administrative databases have been validated for many outcomes, exposures, and comorbidities,  
7 including heart failure (HF), chronic obstructive pulmonary disease (COPD), asthma, hypertension,  
8 myocardial infarction (MI), and diabetes. Ontario is the most populous province in Canada, with ~14.6  
9 million residents, and it is one of the most ethnically diverse jurisdictions in the world.

10  
11  
12  
13  
14  
15  
16  
17  
18  
19 Potential covariates considered in the analyses are detailed in **Table 1** and included  
20 demographic, physiological, anatomical and comorbidity data, as well as information regarding the  
21 proposed procedure (operative priority status, recommended surgical wait time, preoperative cardiogenic  
22 shock, redo sternotomy, and type of surgery).

23  
24  
25  
26  
27  
28  
29 As with our previous studies (3, 7-19), height, weight, operative priority, and information  
30 pertaining to LVEF, valvular disease, and coronary anatomy were obtained from the CorHealth Ontario  
31 registry. In addition, comorbidities were identified from the CorHealth Ontario registry and  
32 supplemented with data from DAD and OHIP using International Classification of Diseases 10<sup>th</sup>  
33 Revision (ICD-10-CA) codes (20) within five years prior to the index procedure, according to validated  
34 algorithms (21-24).

## 44 45 **Outcome**

46  
47 The primary outcome was all-cause mortality that occurred between the date of acceptance onto  
48 the waitlist and the date of removal from the waitlist.

## 53 54 **Statistical Analysis**

1  
2  
3 Continuous variables were compared with a 2-sample *t*-test or with a Wilcoxon rank sum test for  
4 non-normally distributed data. Categorical variables were compared with a chi-square test.  
5  
6  
7  
8  
9

### 10 ***Missing Data***

11  
12 Left ventricular ejection fraction (LVEF) was missing in 3,197 (2.8%), preoperative serum  
13 creatinine value in 5,021 (4.5%), height in 5,795 (5.2%) and weight in 5,464 (4.9%) patients. No other  
14 data were missing. The missing values were imputed using multiple imputations with fully conditional  
15 (Markov chain Monte Carlo [MCMC]) methods (25). Specifically, logistic regression modelling was  
16 used to generate five imputed datasets within the SAS “proc MI” framework, where missing values were  
17 predicted drawing on all candidate covariates. Each imputation provided a complete dataset, reflecting  
18 the distributions and correlations between variables.  
19  
20  
21  
22  
23  
24  
25  
26  
27  
28  
29  
30

### 31 ***Model Development***

32  
33 We used a hybrid approach of Random Forests for initial variable selection, followed by  
34 stepwise logistic regression for clinical interpretability and parsimony. Details of the Random Forests  
35 method have been described elsewhere (26-28). In short, we used a bootstrap sample of the data to build  
36 each of the classification trees. A random subset of variables was selected at each split, thereby  
37 constructing a large collection of decision trees with controlled variation. The trees are left unpruned in  
38 order to minimize bias. Every tree in the forest casts a “vote” for the best classification for a given  
39 observation, and the class receiving the most votes results in the prediction for that specific observation.  
40 The dataset was first sampled to create an in-bag partition (2/3 of derivation sample) to construct the  
41 decision tree, and a smaller out-of-bag partition (1/3 of derivation sample) to test the constructed tree to  
42 evaluate its performance. Random Forests calculates estimates of variable importance for classification  
43  
44  
45  
46  
47  
48  
49  
50  
51  
52  
53  
54  
55  
56  
57  
58  
59  
60

1  
2  
3 using the permutation variable importance measure (26), which is based on the decrease of classification  
4 accuracy when values of a variable in a node of a tree are permuted randomly. Our model was based on  
5  
6 500 classification trees and 6 variables available for splitting at each tree node.  
7  
8

9  
10 We identified a subset of the top 30 predictor variables out of the 40 candidate variables and  
11 incorporated them into a logistic model. According to methods described by Harrell and colleagues (29),  
12 predictor variables with univariate  $P$ -values of  $< 0.10$  were entered into a multivariable stepwise logistic  
13 regression model based on both clinical and statistical significance. We used a backward variable  
14 selection algorithm, retaining in the final model covariates with  $P$ -values of  $< 0.05$  as well as those  
15 deemed to be clinically important. The final prediction model was termed the CardiOttawa Waitlist  
16 Mortality Score.  
17  
18  
19  
20  
21  
22  
23  
24  
25  
26  
27

### 28 ***Model Evaluation***

29  
30 Model discrimination was evaluated using the c-statistic. An optimism-corrected c-statistic was  
31 obtained from 200 bootstrap samples drawn with replacement from the study sample. The Youden index  
32 was used to determine optimal cut-off points for calculating measures of validity, including sensitivity,  
33 specificity, positive predictive value (PPV), and negative predictive value (NPV) (30). Calibration was  
34 assessed using the Hosmer–Lemeshow chi-square statistic, the Brier score (29), and a comparison of  
35 observed versus expected mortality rates within quintiles of expected risk in the overall cohort, as well  
36 as across different subgroups according to the type of surgery.  
37  
38  
39  
40  
41  
42  
43  
44  
45  
46  
47  
48

49 We used the “RandomForest” package for R (version 3.6.3, R Foundation, New Zealand), as  
50 well as SAS version 9.4 (SAS Institute, Cary, NC). Statistical significance was defined by a two-sided  
51  $P$ -value of  $< 0.05$ .  
52  
53  
54  
55  
56  
57  
58  
59  
60



## RESULTS

Among the 112,266 patients referred for cardiac surgery, 269 (0.24%) died while on the waitlist. Of these waitlist deaths, 118 (0.16%) occurred while awaiting isolated CABG, 81 (0.33%) while awaiting valve procedures, 63 (0.51%) while awaiting combined CABG/valve procedures, and 7 (0.21%) while awaiting thoracic aorta procedures. The median wait time was 13 (IQR, 4-38) days overall and was 7 (3-26) days for CABG, 32 (12-62) days for valvular surgery, 21 (7-46) days for combined CABG/valve, and 35 (9-64) days for thoracic aorta procedures.

Compared with patients who survived the waitlist period, those who died were older; more likely to have had a high-risk ACS; to have reduced LVEF, HF, aortic or mitral regurgitation warranting operative intervention, severe aortic stenosis, comorbidities such as diabetes, cerebrovascular disease, peripheral arterial disease, renal and liver dysfunction, anemia, or psychosis; to be scheduled for urgent, reoperative valvular or combined CABG/valve surgery with shorter recommended wait times, and to present with unanticipated cardiogenic shock prior to the scheduled procedure (**Table 1**).

### Predictors of Waitlist Mortality

The accuracy of the Random Forests model was 76%. The resulting top 30 predictor variables are summarized in **Supplemental Figure S1**. After we applied stepwise logistic regression to achieve parsimony, the final model consisted of 11 variables (**Table 2**). Sex, type of surgery, LM-equivalent anatomy, and CCS classification were forced into the model on the basis of clinical significance. Other multivariable predictors of waitlist mortality were age, LVEF, history of HF, atrial fibrillation, dialysis, psychosis, and operative priority.

### Model Performance

The c-statistic of the multivariable model was 0.76. After optimism correction, the c-statistic was 0.73, the Hosmer–Lemeshow chi-square statistic was 10.76 ( $P = 0.22$ ), and the Brier score was 0.0024.

**Table 3** shows the observed rates of waitlist mortality according to each risk quintile. The lowest risk quintile had a waitlist mortality of 0.058% (95% CI, 0.024-0.094%), while the highest quintile had a waitlist mortality of 0.67% (95% CI, 0.56-0.76%). The observed and predicted numbers of waitlist deaths were similar across all probability quintiles. The model was highly calibrated within each category of surgery (**Figure 1**). The receiver-operating characteristic curve for the CardiOttawa Waitlist Mortality model is presented in **Figure 2**. The optimal cut-off point on the ROC curve was at a predicted probability of 0.24%, with the following characteristics: sensitivity, 69.1%; specificity, 72.1%; PPV, 0.59%; NPV, 99.9%.

### Sensitivity Analysis

*Post-hoc*, we investigated the procedures for which operative priority was unknown. We found that all of these cases were booked as thoracic aorta surgery. We then imputed the operative priority status for these procedures and followed the same modelling approach as described above. The final model (**Supplemental Table S1**) was similar to the original model, with a c-statistic of 0.75 (0.72 after optimism correction), Hosmer-Lemeshow chi-square statistic of 8.00 ( $P = 0.43$ ), and Brier score of 0.0024.

### CardiOttawa Waitlist Mortality Score

The  $\beta$ -coefficients for the final model are presented in **Table 2** (online calculator available at <https://cardiottawa.ottawaheart.ca/>).

## DISCUSSION

Waitlist management for high-risk patients such as those needing cardiac surgery is an ongoing challenge for clinicians and administrators in Canada and other publicly-funded healthcare systems around the world, where access to these procedures is limited by surgical capacity (6). The cardiac surgery waitlist has grown during the COVID-19 pandemic through lengthening wait times (1) and delayed disease presentation due to missed cardiac specialist visits (31, 32). As the pandemic evolves and when it ultimately ends, evidence-based criteria are needed to facilitate timely and efficient resource allocation to address this global surgical backlog.

The few existing waitlist risk algorithms were either single-center, included small numbers of events, or were tailored to specific populations such as patients awaiting CABG or heart transplantation. The only contemporary study of waitlist mortality that broadly encompassed major types of cardiac procedures was limited to risk factor identification. The current Canadian cardiac surgical wait time benchmarks were developed based on expert opinion in 2005 and has limited ability to prevent waitlist deaths (6). In fact, a recent study that investigated 101 cardiac surgery waitlist deaths in Alberta, Canada found that many patients died within the CCS recommended waitlist timeframes (6). A recent statement from the Canadian Society of Cardiac Surgeons highlighted “it is critically important that cardiac surgeons ensure the presence of a robust wait-times database at their institutions that captures rates of adverse events in these patients while on the waitlist so that decisions around the reallocation of resources may be made in a timely fashion” (33). Despite the need for a data-driven waitlist assessment tool to improve patient care, the triage classification system proposed in this recommendation had not been tested using real-world data (34).

We developed the CardiOttawa Waitlist Mortality Score to provide triage decision support for cardiac surgery patients, using variables that are readily available at the time of surgical referral. The

1  
2  
3 CardiOttawa was derived and validated on a large and representative population. It discriminates well,  
4  
5 has excellent calibration across all types of surgery, and is to our knowledge the first predictive  
6  
7 algorithm that applies to a broad range of cardiac surgical procedures. In comparison, the study by  
8  
9 Senaratne *et al.* found that CCS recommended wait times poorly discriminated waitlist mortality across  
10  
11 a similar variety of proposed cardiac procedures (c-statistic = 0.577) (34). A smaller, single-center  
12  
13 Scandinavian study that produced a mortality risk score from 42 CABG waitlist deaths did not report  
14  
15 performance metrics for the model (4).  
16  
17  
18

19  
20 Current waitlist recommendations are based primarily on anatomic factors such as coronary and  
21  
22 valvular heart disease. The CardiOttawa predictor variables are consistent with those identified in the  
23  
24 literature (4-6, 35) and capture important information on baseline patient factors (demographic, medical  
25  
26 conditions, hemodynamic stability) as well as proposed surgical information, in addition to anatomic  
27  
28 factors. Whereas the CCS recommended cardiac procedure wait times are likely too long to ensure  
29  
30 patient safety, the CardiOttawa Waitlist Mortality Score has the potential to reduce patient mortality  
31  
32 through better risk stratification at the time of referral. This waitlist score could be combined with the  
33  
34 CardiOttawa LOS Score (3) to identify high-risk patients and enable evidence-based surgical scheduling  
35  
36 to optimize postoperative ICU resource use. The combined risk calculator termed the CardiOttawa 2.1:  
37  
38 COVID Triage Tool can be accessed at <https://cardiottawa.ottawaheart.ca>. The caveat that applies to all  
39  
40 decision-support tools is pertinent because the CardiOttawa Waitlist Mortality Score is intended to assist  
41  
42 the clinician, who should ultimately synthesize the predictive score with clinical judgment in making  
43  
44 decisions.  
45  
46  
47  
48  
49  
50

## 51 **Strengths and Limitations**

52  
53  
54  
55  
56  
57  
58  
59  
60

1  
2  
3 Major strengths of our waitlist mortality tool are that it was derived from a large, ethnically  
4 diverse population, its high degree of calibration across a broad spectrum of cardiac surgeries, and its  
5 suitability for use at the time of surgical referral. As it is intended to guide waitlist triage decisions, it is  
6 important that the model be validated in a patient sample that is representative of the population for  
7 which the tool will be used. Our study has some limitations. *First*, universal drug coverage is only  
8 available to Ontario residents aged 65 years and older, and thus we were not able to include information  
9 on prescription medications for all patients in the modelling process. However, medications have not  
10 routinely been incorporated in cardiac surgical risk models to date. In addition, model simplicity is an  
11 important element of decision-support tools, and thus it is better to carefully select potential factors  
12 rather than to incorporate an exhaustive list. *Second*, certain detailed physiologic measures such as brain  
13 natriuretic peptide were lacking in the databases used. However, brain natriuretic peptide is not routinely  
14 measured in the perioperative setting. *Third*, the low event rates within each type of surgery preclude  
15 procedure-specific modelling. Nonetheless, a multicenter, omnibus risk model is efficient and practical,  
16 as operating time is a shared resource.

## 37 CONCLUSIONS

38  
39 The CardiOttawa Waitlist Mortality Score is a simple clinical risk model that predicts the  
40 likelihood of waitlist deaths in patients awaiting major cardiac surgery. The importance of this  
41 predictive model is underscored by the inclusion of a population-based sample and its excellent  
42 calibration across all procedure types. It can be combined with the CardiOttawa LOS Score to provide  
43 rapid, data-driven decision support for clinicians, hospital administrators, and policy-makers as they  
44 manage access to cardiac care and preserve system capacity during the COVID-19 crisis, the recovery  
45 period, and beyond.

**REFERENCES**

1. Ad N, Luc JGY, Nguyen TC. Cardiac surgery in North America and coronavirus disease 2019 (COVID-19): Regional variability in burden and impact. *J Thorac Cardiovasc Surg.* 2020.
2. Wang J, Vahid S, Eberg M, Milroy S, Milkovich J, Wright FC, et al. Clearing the surgical backlog caused by COVID-19 in Ontario: a time series modelling study. *Cmaj.* 2020;192(44):E1347-e56.
3. Sun LY, Bader Eddeen A, Ruel M, MacPhee E, Mesana TG. Derivation and Validation of a Clinical Model to Predict Intensive Care Unit Length of Stay After Cardiac Surgery. *J Am Heart Assoc.* 2020;9(21):e017847.
4. Rexius H, Brandrup-Wognsen G, Odén A, Jeppsson A. Mortality on the waiting list for coronary artery bypass grafting: incidence and risk factors. *Ann Thorac Surg.* 2004;77(3):769-74; discussion 74-5.
5. Jasseron C, Legeai C, Jacquelinet C, Leprince P, Cantrelle C, Audry B, et al. Prediction of Waitlist Mortality in Adult Heart Transplant Candidates: The Candidate Risk Score. *Transplantation.* 2017;101(9):2175-82.
6. Senaratne JM, Norris CM, Youngson E, McClure RS, Nagendran J, Butler CR, et al. Variables Associated With Cardiac Surgical Waitlist Mortality From a Population-Based Cohort. *Can J Cardiol.* 2019;35(1):61-7.
7. Sun LY, Spence SD, Benton S, Beanlands RS, Austin PC, Bader Eddeen A, et al. Age, Not Sex, Modifies the Effect of Frailty on Long-term Outcomes After Cardiac Surgery. *Ann Surg.* 2020.
8. Hayatsu Y, Ruel M, Bader Eddeen A, Sun L. Single Versus Multiple Arterial Revascularization in Patients With Reduced Renal Function: Long-term Outcome Comparisons in 23,406 CABG Patients From Ontario, Canada. *Ann Surg.* 2020.
9. Johnston A, Mesana TG, Lee DS, Eddeen AB, Sun LY. Sex Differences in Long-Term Survival After Major Cardiac Surgery: A Population-Based Cohort Study. *J Am Heart Assoc.* 2019;8(17):e013260.
10. Rubens FD, Wells GA, Coutinho T, Eddeen AB, Sun LY. Sex differences after coronary artery bypass grafting with a second arterial conduit. *J Thorac Cardiovasc Surg.* 2020.
11. Sun LY, Gaudino M, Chen RJ, Bader Eddeen A, Ruel M. Long-term Outcomes in Patients With Severely Reduced Left Ventricular Ejection Fraction Undergoing Percutaneous Coronary Intervention vs Coronary Artery Bypass Grafting. *JAMA Cardiol.* 2020;5(6):631-41.
12. Sun LY, Tu JV, Bader Eddeen A, Liu PP. Prevalence and Long-Term Survival After Coronary Artery Bypass Grafting in Women and Men With Heart Failure and Preserved Versus Reduced Ejection Fraction. *J Am Heart Assoc.* 2018;7(12).

13. Sun LY, Tu JV, Lee DS, Beanlands RS, Ruel M, Austin PC, et al. Disability-free survival after coronary artery bypass grafting in women and men with heart failure. *Open Heart*. 2018;5(2):e000911.
14. Tam DY, Dharma C, Rocha R, Farkouh ME, Abdel-Qadir H, Sun LY, et al. Long-Term Survival After Surgical or Percutaneous Revascularization in Patients With Diabetes and Multivessel Coronary Disease. *J Am Coll Cardiol*. 2020;76(10):1153-64.
15. Tran DTT, Tu JV, Dupuis JY, Bader Eddeen A, Sun LY. Association of Frailty and Long-Term Survival in Patients Undergoing Coronary Artery Bypass Grafting. *J Am Heart Assoc*. 2018;7(15).
16. Sun LY, Gershon AS, Ko DT, Thilen SR, Yun L, Beattie WS, et al. Trends in Pulmonary Function Testing Before Noncardiothoracic Surgery. *JAMA Intern Med*. 2015;175(8):1410-2.
17. Sun LY, Kimmoun A, Takagi K, Liu PP, Bader Eddeen A, Mebazaa A. Ethnic differences in acute heart failure outcomes in Ontario. *Int J Cardiol*. 2019;291:177-82.
18. Sun LY, Tu JV, Coutinho T, Turek M, Rubens FD, McDonnell L, et al. Sex differences in outcomes of heart failure in an ambulatory, population-based cohort from 2009 to 2013. *Cmaj*. 2018;190(28):E848-e54.
19. Sun LY, Tu JV, Sherrard H, Rodger N, Coutinho T, Turek M, et al. Sex-Specific Trends in Incidence and Mortality for Urban and Rural Ambulatory Patients with Heart Failure in Eastern Ontario from 1994 to 2013. *J Card Fail*. 2018;24(9):568-74.
20. Quan H, Sundararajan V, Halfon P, Fong A, Burnand B, Luthi J, et al. Coding algorithms for defining comorbidities in ICD-9-CM and ICD-10 administrative data. *Med Care*. 2005;43(11).
21. Tu K, Campbell N, Chen Z, Cauch-Dudek K, McAlister F. Accuracy of administrative databases in identifying patients with hypertension. *Open Med*. 2007;1(1):e18-26.
22. Hux J, Ivis F, Flintoft V, Bica A. Diabetes in Ontario: Determination of prevalence and incidence using a validated administrative data algorithm. *Diabetes Care*. 2002;25(3):512-6.
23. Gershon A, Wang C, Guan J, Vasilevska-Ristovska J, Cicutto L, To T. Identifying individuals with physician diagnosed COPD in health administrative databases. *COPD*. 2009;6(5):388-94.
24. Schultz S, Rothwell D, Chen Z, Tu K. Identifying cases of congestive heart failure from administrative data: a validation study using primary care patient records. *Chronic Dis Inj Can*. 2013;33(3):160-6.
25. Sterne JA, White IR, Carlin JB, Spratt M, Royston P, Kenward MG, et al. Multiple imputation for missing data in epidemiological and clinical research: potential and pitfalls. *BMJ*. 2009;338:b2393.
26. Breiman L. Random Forests. *Machine Learning*. 2001;45:5-32.

- 1
  - 2
  - 3
  - 4
  - 5
  - 6
  - 7
  - 8
  - 9
  - 10
  - 11
  - 12
  - 13
  - 14
  - 15
  - 16
  - 17
  - 18
  - 19
  - 20
  - 21
  - 22
  - 23
  - 24
  - 25
  - 26
  - 27
  - 28
  - 29
  - 30
  - 31
  - 32
  - 33
  - 34
  - 35
  - 36
  - 37
  - 38
  - 39
  - 40
  - 41
  - 42
  - 43
  - 44
  - 45
  - 46
  - 47
  - 48
  - 49
  - 50
  - 51
  - 52
  - 53
  - 54
  - 55
  - 56
  - 57
  - 58
  - 59
  - 60
27. Liam A, Wiener M. Classification and regression by random forest. *R News*. 2002;2(3):315-26.
28. Touw WG, Bayjanov JR, Overmars L, Backus L, Boekhorst J, Wels M, et al. Data mining in the Life Sciences with Random Forest: a walk in the park or lost in the jungle? *Brief Bioinform*. 2013;14(3):315-26.
29. Harrell FE, Jr., Lee KL, Mark DB. Multivariable prognostic models: issues in developing models, evaluating assumptions and adequacy, and measuring and reducing errors. *Stat Med*. 1996;15(4):361-87.
30. Ruopp MD, Perkins NJ, Whitcomb BW, Schisterman EF. Youden Index and optimal cut-point estimated from observations affected by a lower limit of detection. *Biom J*. 2008;50(3):419-30.
31. Lange SJ, Ritchey MD, Goodman AB, Dias T, Twentyman E, Fuld J, et al. Potential Indirect Effects of the COVID-19 Pandemic on Use of Emergency Departments for Acute Life-Threatening Conditions - United States, January-May 2020. *MMWR Morb Mortal Wkly Rep*. 2020;69(25):795-800.
32. Frankfurter C, Buchan TA, Kobulnik J, Lee DS, Luk A, McDonald M, et al. Reduced Rate of Hospital Presentations for Heart Failure During the COVID-19 Pandemic in Toronto, Canada. *Can J Cardiol*. 2020;36(10):1680-4.
33. Hassan A, Arora RC, Adams C, Bouchard D, Cook R, Gunning D, et al. Cardiac Surgery in Canada During the COVID-19 Pandemic: A Guidance Statement From the Canadian Society of Cardiac Surgeons. *Can J Cardiol*. 2020;36(6):952-5.
34. Patel V, Jimenez E, Cornwell L, Tran T, Paniagua D, Denktas AE, et al. Cardiac Surgery During the Coronavirus Disease 2019 Pandemic: Perioperative Considerations and Triage Recommendations. *J Am Heart Assoc*. 2020;9(13):e017042.
35. Morgan CD, Sykora K, Naylor CD. Analysis of deaths while waiting for cardiac surgery among 29,293 consecutive patients in Ontario, Canada. The Steering Committee of the Cardiac Care Network of Ontario. *Heart*. 1998;79(4):345-9.



1  
2  
3  
4  
5  
6  
7 **FIGURE LEGENDS**  
8

9  
10 **Figure 1.** Observed vs. expected waitlist deaths by type of cardiac surgery.  
11

12  
13 Legend: The error bars indicate 95% confidence intervals and were obtained through 200 bootstraps.  
14  
15

16  
17 **Figure 2.** Receiver-operating characteristic curve of the CardiOttawa Waitlist Score model.  
18  
19

20  
21  
22  
23  
24  
25  
26  
27 **SUPPLEMENTAL DIGITAL CONTENT**  
28

29  
30 **Supplemental Figure S1.** Top 30 covariates from random forests.  
31

32  
33 **Supplemental Table S1.** Multivariable predictors of waitlist death in the model that imputed unknown  
34 operative priority.  
35  
36  
37  
38  
39  
40  
41  
42  
43  
44  
45  
46  
47  
48  
49  
50  
51  
52  
53  
54  
55  
56  
57  
58  
59  
60

1  
2  
3  
4  
5  
6  
7  
8  
9  
10  
11  
12  
13  
14  
15  
16  
17  
18  
19  
20  
21  
22  
23  
24  
25  
26  
27  
28  
29  
30  
31  
32  
33  
34  
35  
36  
37  
38  
39  
40  
41  
42  
43  
44  
45  
46  
47  
48  
49  
50  
51  
52  
53  
54  
55  
56  
57  
58  
59  
60

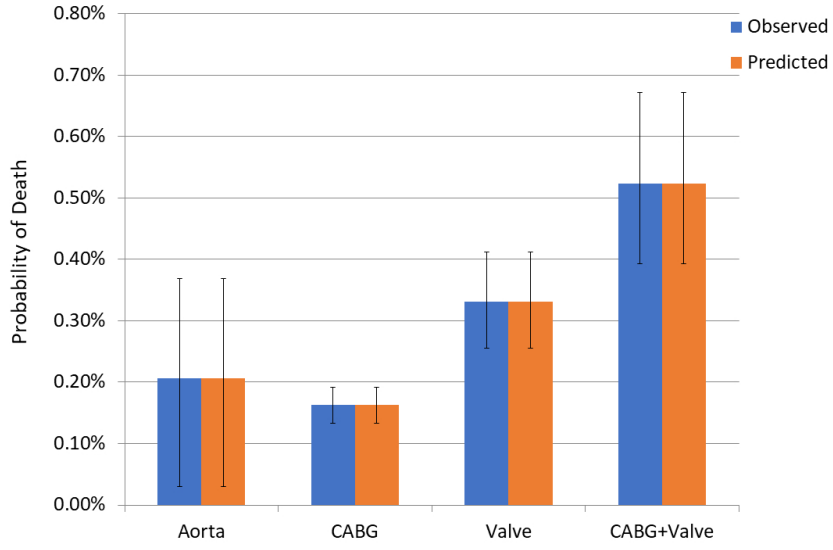

Observed vs. expected waitlist deaths by type of cardiac surgery. Legend: The error bars indicate 95% confidence intervals and were obtained through 200 bootstraps.

338x190mm (96 x 96 DPI)

1  
2  
3  
4  
5  
6  
7  
8  
9  
10  
11  
12  
13  
14  
15  
16  
17  
18  
19  
20  
21  
22  
23  
24  
25  
26  
27  
28  
29  
30  
31  
32  
33  
34  
35  
36  
37  
38  
39  
40  
41  
42  
43  
44  
45  
46  
47  
48  
49  
50  
51  
52  
53  
54  
55  
56  
57  
58  
59  
60

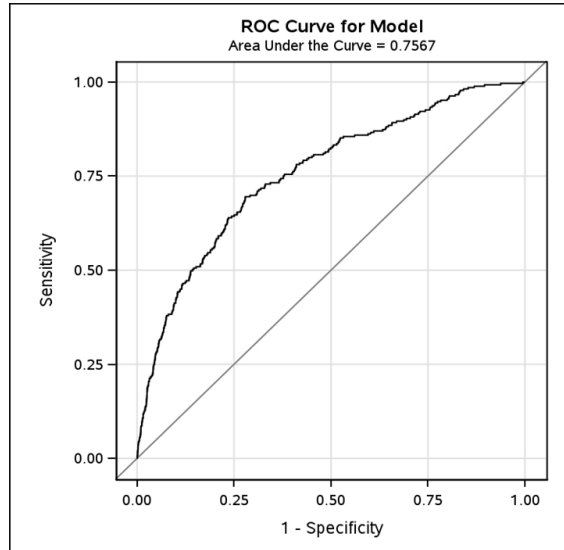

Receiver-operating characteristic curve of the CardiOttawa Waitlist Score model.

338x190mm (96 x 96 DPI)

**Table 1.** Baseline characteristics.

| Variable                                    | Dead<br>(n=269) | Not Dead<br>(n=111,997) | Total<br>(n=112,266) | P-value |
|---------------------------------------------|-----------------|-------------------------|----------------------|---------|
| <b>Demographics</b>                         |                 |                         |                      |         |
| Age, Mean $\pm$ SD, y                       | 70.3 $\pm$ 11.0 | 66.4 $\pm$ 10.9         | 66.4 $\pm$ 10.9      | <0.001  |
| Age, Median (IQR), y                        | 71 (64-79)      | 67 (59-74)              | 67 (59-74)           | <0.001  |
| Female sex, No. (%)                         | 80 (29.7)       | 28,574 (25.5)           | 28,654 (25.5)        | 0.112   |
| BMI, Mean $\pm$ SD, kg/m <sup>2</sup>       | 28.1 $\pm$ 5.7  | 28.8 $\pm$ 5.5          | 28.8 $\pm$ 5.5       | 0.052   |
| BMI, Median (IQR), kg/m <sup>2</sup>        | 27 (24-31)      | 28 (25-32)              | 28 (25-32)           | 0.017   |
| Rural residence, No. (%)                    | 42 (15.6)       | 17,181 (15.3)           | 17,223 (15.3)        | 0.901   |
| Hospital type, No. (%)                      |                 |                         |                      | 0.816   |
| Community                                   | 76 (28.3)       | 30,932 (27.6)           | 31,008 (27.6)        |         |
| Teaching                                    | 193 (71.7)      | 81,065 (72.4)           | 81,258 (72.4)        |         |
| <b>Comorbidities</b>                        |                 |                         |                      |         |
| Hypertension, No. (%)                       | 233 (86.6)      | 94,413 (84.3)           | 94,646 (84.3)        | 0.297   |
| Atrial fibrillation, No. (%)                | 54 (20.1)       | 19,898 (17.8)           | 19,952 (17.8)        | 0.323   |
| Recent MI, No. (%)                          | 81 (30.1)       | 27,295 (24.4)           | 27,376 (24.4)        | 0.029   |
| CCS classification, No. (%)                 |                 |                         |                      | <0.001  |
| 0                                           | 85 (31.6)       | 27,555 (24.6)           | 27,640 (24.6)        |         |
| 1                                           | 25 (9.3)        | 10,812 (9.7)            | 10,837 (9.7)         |         |
| 2                                           | 33 (12.3)       | 18,198 (16.2)           | 18,231 (16.2)        |         |
| 3                                           | 29 (10.8)       | 16,158 (14.4)           | 16,187 (14.4)        |         |
| 4                                           | 12 (4.5)        | 3,865 (3.5)             | 3,877 (3.5)          |         |
| Low-risk ACS                                | 28 (10.4)       | 16,632 (14.9)           | 16,660 (14.8)        |         |
| Intermediate-risk ACS                       | 35 (13.0)       | 14,477 (12.9)           | 14,512 (12.9)        |         |
| High-risk ACS                               | 22 (8.2)        | 4,300 (3.8)             | 4,322 (3.8)          |         |
| LM or LM equivalent disease, No. (%)        | 105 (39.0)      | 46,651 (41.7)           | 46,756 (41.6)        | 0.384   |
| Proximal LAD disease, No. (%)               | 97 (36.1)       | 43,483 (38.8)           | 43,580 (38.8)        | 0.353   |
| Previous PCI, No. (%)                       | 28 (10.4)       | 12,393 (11.1)           | 12,421 (11.1)        | 0.732   |
| Left ventricular ejection fraction, No. (%) |                 |                         |                      | <0.001  |
| $\geq$ 50%                                  | 135 (50.2)      | 78,679 (70.3)           | 78,814 (70.2)        |         |
| 35-49%                                      | 77 (28.6)       | 22,667 (20.2)           | 22,744 (20.3)        |         |
| 20-35%                                      | 47 (17.5)       | 8,989 (8.0)             | 9,036 (8.0)          |         |
| < 20%                                       | 10 (3.7)        | 1,662 (1.5)             | 1,672 (1.5)          |         |
| NYHA classification, No. (%)                |                 |                         |                      | <0.001  |
| 1                                           | 147 (54.6)      | 75,515 (67.4)           | 75,662 (67.4)        |         |
| 2                                           | 57 (21.2)       | 17,821 (15.9)           | 17,878 (15.9)        |         |
| 3                                           | 51 (19.0)       | 15,241 (13.6)           | 15,292 (13.6)        |         |
| 4                                           | 14 (5.2)        | 3,420 (3.1)             | 3,434 (3.1)          |         |

|    |                                               |                 |                 |                 |        |
|----|-----------------------------------------------|-----------------|-----------------|-----------------|--------|
| 1  |                                               |                 |                 |                 |        |
| 2  | Heart failure, No. (%)                        | 145 (53.9)      | 30,217 (27.0)   | 30,362 (27.0)   | <0.001 |
| 3  |                                               |                 |                 |                 |        |
| 4  | Moderate-severe mitral regurgitation, No. (%) | 38 (14.1)       | 9,830 (8.8)     | 9,868 (8.8)     | 0.002  |
| 5  |                                               |                 |                 |                 |        |
| 6  | Moderate-severe aortic regurgitation, No. (%) | 15 (5.6)        | 3,567 (3.2)     | 3,582 (3.2)     | 0.026  |
| 7  | Severe aortic stenosis, No. (%)               | 109 (40.5)      | 26,192 (23.4)   | 26,301 (23.4)   | <0.001 |
| 8  | Endocarditis, No. (%)                         |                 |                 |                 | 0.016  |
| 9  |                                               |                 |                 |                 |        |
| 10 | None                                          | 260 (96.7)      | 110,207 (98.4)  | 110,467 (98.4)  |        |
| 11 | Acute                                         | 8 (3.0)         | 1,260 (1.1)     | 1,268 (1.1)     |        |
| 12 | Subacute                                      | <=5             | 530 (0.5)       | 531 (0.5)       |        |
| 13 |                                               |                 |                 |                 |        |
| 14 | Cerebrovascular disease, No. (%)              | 41 (15.2)       | 11,407 (10.2)   | 11,448 (10.2)   | 0.006  |
| 15 | Peripheral arterial disease, No. (%)          | 61 (22.7)       | 15,895 (14.2)   | 15,956 (14.2)   | <0.001 |
| 16 | Smoking status, No. (%)                       |                 |                 |                 | 0.345  |
| 17 |                                               |                 |                 |                 |        |
| 18 | Never                                         | 121 (45.0)      | 52,427 (46.8)   | 52,548 (46.8)   |        |
| 19 | Current                                       | 60 (22.3)       | 21,085 (18.8)   | 21,145 (18.8)   |        |
| 20 | Former                                        | 88 (32.7)       | 38,485 (34.4)   | 38,573 (34.4)   |        |
| 21 |                                               |                 |                 |                 |        |
| 22 | COPD, No. (%)                                 | 100 (37.2)      | 26,035 (23.2)   | 26,135 (23.3)   |        |
| 23 | Diabetes, No. (%)                             | 135 (50.2)      | 47,032 (42.0)   | 47,167 (42.0)   | 0.007  |
| 24 | Dyslipidemia, No. (%)                         | 168 (62.5)      | 74,354 (66.4)   | 74,522 (66.4)   | 0.172  |
| 25 | GFR, Mean $\pm$ SD, mL/min/1.73m <sup>2</sup> | 69.4 $\pm$ 33.9 | 85.1 $\pm$ 34.8 | 85.0 $\pm$ 34.8 | <0.001 |
| 26 | GFR, Median (IQR), mL/min/1.73m <sup>2</sup>  | 64 (47-88)      | 81 (61-105)     | 81 (61-105)     | <0.001 |
| 27 | Dialysis, No. (%)                             | 34 (12.6)       | 3,093 (2.8)     | 3,127 (2.8)     | <0.001 |
| 28 | Anemia, No. (%)                               | 37 (13.8)       | 9,304 (8.3)     | 9,341 (8.3)     | 0.001  |
| 29 | Liver disease, No. (%)                        | 9 (3.3)         | 1,551 (1.4)     | 1,560 (1.4)     | 0.006  |
| 30 | Alcohol abuse, No. (%)                        | 7 (2.6)         | 1,500 (1.3)     | 1,507 (1.3)     | 0.072  |
| 31 | Dementia, No. (%)                             | 6 (2.2)         | 1,475 (1.3)     | 1,481 (1.3)     | 0.19   |
| 32 | Depression, No. (%)                           | 7 (2.6)         | 1,425 (1.3)     | 1,432 (1.3)     | 0.052  |
| 33 | Psychosis, No. (%)                            | <=5             | 214 (0.2)       | 217 (0.2)       | <0.001 |
| 34 | Primary cancer, No. (%)                       | 17 (6.3)        | 5,611 (5.0)     | 5,628 (5.0)     | 0.325  |
| 35 | Metastatic cancer, No. (%)                    | <=5             | 578 (0.5)       | 578 (0.5)       | 0.237  |
| 36 |                                               |                 |                 |                 |        |
| 37 |                                               |                 |                 |                 |        |
| 38 |                                               |                 |                 |                 |        |
| 39 |                                               |                 |                 |                 |        |
| 40 |                                               |                 |                 |                 |        |
| 41 |                                               |                 |                 |                 |        |
| 42 |                                               |                 |                 |                 |        |
| 43 | <b>Operative characteristics</b>              |                 |                 |                 |        |
| 44 |                                               |                 |                 |                 |        |
| 45 | Surgery type, No. (%)                         |                 |                 |                 | <0.001 |
| 46 | CABG                                          | 118 (43.9)      | 72,248 (64.5)   | 72,366 (64.5)   |        |
| 47 | Valve                                         | 81 (30.1)       | 24,380 (21.8)   | 24,461 (21.8)   |        |
| 48 | CABG + Valve                                  | 63 (23.4)       | 11,983 (10.7)   | 12,046 (10.7)   |        |
| 49 | Thoracic Aorta                                | 7 (2.6)         | 3,386 (3.0)     | 3,393 (3.0)     |        |
| 50 | Redo-Sternotomy, No. (%)                      | 19 (7.1)        | 3,315 (3.0)     | 3,334 (3.0)     | <0.001 |
| 51 | Cardiogenic Shock, No. (%)                    | <=5             | 221 (0.2)       | 223 (0.2)       | 0.044  |
| 52 | Operative priority, No. (%)                   |                 |                 |                 | <0.001 |
| 53 |                                               |                 |                 |                 |        |
| 54 | Unknown                                       | 67 (24.9)       | 13,004 (11.6)   | 13,071 (11.6)   |        |
| 55 |                                               |                 |                 |                 |        |
| 56 |                                               |                 |                 |                 |        |
| 57 |                                               |                 |                 |                 |        |
| 58 |                                               |                 |                 |                 |        |
| 59 |                                               |                 |                 |                 |        |
| 60 |                                               |                 |                 |                 |        |

|    |                                               |                 |                 |                 |        |
|----|-----------------------------------------------|-----------------|-----------------|-----------------|--------|
| 1  |                                               |                 |                 |                 |        |
| 2  | Emergent                                      | 18 (6.7)        | 3,460 (3.1)     | 3,478 (3.1)     |        |
| 3  | Urgent                                        | 90 (33.5)       | 31,244 (27.9)   | 31,334 (27.9)   |        |
| 4  | Semi-urgent                                   | 41 (15.2)       | 25,799 (23.0)   | 25,840 (23.0)   |        |
| 5  | Elective                                      | 53 (19.7)       | 38,490 (34.4)   | 38,543 (34.3)   |        |
| 6  |                                               |                 |                 |                 |        |
| 7  |                                               |                 |                 |                 |        |
| 8  | Recommend maximum wait time, Mean $\pm$ SD, d | 23.3 $\pm$ 27.8 | 34.9 $\pm$ 31.3 | 34.9 $\pm$ 31.3 | <0.001 |
| 9  |                                               |                 |                 |                 |        |
| 10 | Recommend maximum wait time, Median (IQR), d  | 14 (3-35)       | 22 (13-56)      | 22 (13-56)      | <0.001 |
| 11 |                                               |                 |                 |                 |        |
| 12 | Adherence to recommended wait time, No. (%)   | 124 (46.1)      | 74,809 (66.8)   | 74,933 (66.7)   | <0.001 |
| 13 |                                               |                 |                 |                 |        |

14

15 **Abbreviations:** SD = standard deviation; IQR = interquartile range; BMI = body mass index; MI = myocardial infarction;  
 16 CCS = Canadian Cardiovascular Society; ACS = acute coronary syndrome; LM = left main; LAD = left anterior  
 17 descending; PCI = percutaneous coronary intervention; LVEF = left ventricular ejection fraction; NYHA = New York Heart  
 18 Association; COPD = chronic obstructive pulmonary disease; GFR = glomerular filtration rate; CABG = coronary artery  
 19 bypass grafting  
 20  
 21  
 22  
 23  
 24  
 25  
 26  
 27  
 28  
 29  
 30  
 31  
 32  
 33  
 34  
 35  
 36  
 37  
 38  
 39  
 40  
 41  
 42  
 43  
 44  
 45  
 46  
 47  
 48  
 49  
 50  
 51  
 52  
 53  
 54  
 55  
 56  
 57  
 58  
 59  
 60

**Table 2.** Multivariable predictors of waitlist death.

| Variable                           | Model $\beta$ -Coefficient | OR (95% CI)       | Wald Chi-Square | P-value |
|------------------------------------|----------------------------|-------------------|-----------------|---------|
| <b>Demographics</b>                |                            |                   |                 |         |
| Age, yr                            | 0.0325                     | 1.03 (1.02-1.05)  | 27.0617         | <0.001  |
| Female sex                         | 0.0384                     | 1.04 (0.79-1.36)  | 0.0774          | 0.781   |
| <b>Comorbidities</b>               |                            |                   |                 |         |
| CCS classification                 |                            |                   |                 |         |
| 0                                  | NA                         | Reference         | Reference       | NA      |
| 1                                  | -0.0793                    | 0.92 (0.59-1.46)  | 0.1159          | 0.734   |
| 2                                  | -0.0537                    | 0.95 (0.61-1.47)  | 0.0582          | 0.809   |
| 3                                  | -0.0842                    | 0.92 (0.58-1.46)  | 0.1280          | 0.721   |
| 4                                  | 0.3933                     | 1.48 (0.78-2.82)  | 1.4389          | 0.230   |
| Low-risk ACS                       | -0.1812                    | 0.83 (0.51-1.35)  | 0.5365          | 0.464   |
| Intermediate-risk ACS              | 0.0792                     | 1.08 (0.66-1.77)  | 0.1002          | 0.752   |
| High-risk ACS                      | 0.4167                     | 1.52 (0.74-3.11)  | 1.2934          | 0.255   |
| LM or LM equivalent disease        | 0.2452                     | 1.28 (0.98-1.76)  | 2.2699          | 0.132   |
| Left ventricular ejection fraction |                            |                   |                 |         |
| $\geq 50\%$                        | NA                         | Reference         | Reference       | NA      |
| 35-49%                             | 0.6926                     | 2.00 (1.49-2.69)  | 20.9352         | <0.001  |
| 20-35%                             | 0.9147                     | 2.50 (1.72-3.62)  | 23.2995         | <0.001  |
| < 20%                              | 1.0086                     | 2.74 (1.39-5.43)  | 8.3881          | 0.004   |
| Heart failure                      | 0.5546                     | 1.74 (1.31-2.31)  | 14.8925         | <0.001  |
| Atrial fibrillation                | -0.5502                    | 0.58 (0.42-0.79)  | 11.6325         | <0.001  |
| Dialysis                           | 1.3167                     | 3.73 (2.56-5.44)  | 47.0533         | <0.001  |
| Psychosis                          | 1.6878                     | 5.41 (1.70-17.19) | 8.1826          | 0.004   |
| <b>Operative characteristics</b>   |                            |                   |                 |         |
| Surgery type                       |                            |                   |                 |         |
| CABG                               | NA                         | Reference         | Reference       | NA      |
| Valve                              | 0.7432                     | 2.10 (1.33-3.32)  | 10.1776         | 0.001   |
| CABG + Valve                       | 0.8396                     | 2.32 (1.58-3.40)  | 18.2858         | <0.001  |
| Thoracic Aorta                     | 0.0213                     | 1.02 (0.42-2.49)  | 0.0022          | 0.963   |
| Operative priority                 |                            |                   |                 |         |
| Unknown                            | 0.7940                     | 2.21 (1.42-3.45)  | 12.2517         | <0.001  |
| Emergent                           | 0.3014                     | 1.35 (0.60-3.04)  | 0.5335          | 0.465   |
| Urgent                             | -0.00965                   | 0.99 (0.65-1.50)  | 0.0021          | 0.964   |
| Semi-urgent                        | -0.0391                    | 0.96 (0.62-1.49)  | 0.0309          | 0.861   |
| Elective                           | NA                         | Reference         | Reference       | NA      |

**Abbreviations:** OR = odds ratio; CI = confidence interval; CCS = Canadian Cardiovascular Society; LM = left main coronary artery; CABG = coronary artery bypass grafting

**Table 3.** Observed versus predicted number of patients who died while awaiting cardiac surgery. The 95% confidence intervals were obtained through 200 bootstraps with replacement.

| Risk Quintile      | Total | Observed   |                     | Predicted  |                     | OR (95% CI)        |
|--------------------|-------|------------|---------------------|------------|---------------------|--------------------|
|                    |       | No. Events | Rate, % (95% CI)    | No. Events | Rate, % (95% CI)    |                    |
| 1 (Low likelihood) | 22455 | 13         | 0.058 (0.029-0.094) | 13.09      | 0.058 (0.058-0.059) | Reference          |
| 2 (Low-moderate)   | 22450 | 24         | 0.11 (0.069-0.15)   | 21.46      | 0.096 (0.095-0.096) | 1.85 (0.94-3.63)   |
| 3 (Moderate)       | 22474 | 29         | 0.13 (0.080-0.17)   | 32.86      | 0.15 (0.15-0.15)    | 2.23 (1.16-4.29)   |
| 4 (Moderate-high)  | 22437 | 52         | 0.23 (0.18-0.29)    | 52.78      | 0.24 (0.23-0.24)    | 4.01 (2.18-7.37)   |
| 5 (High)           | 22450 | 151        | 0.67 (0.56-0.76)    | 148.83     | 0.66 (0.65-0.67)    | 11.69 (6.63-20.61) |

Confidential



Supplemental Figure S1. Top 30 covariates from random forests.

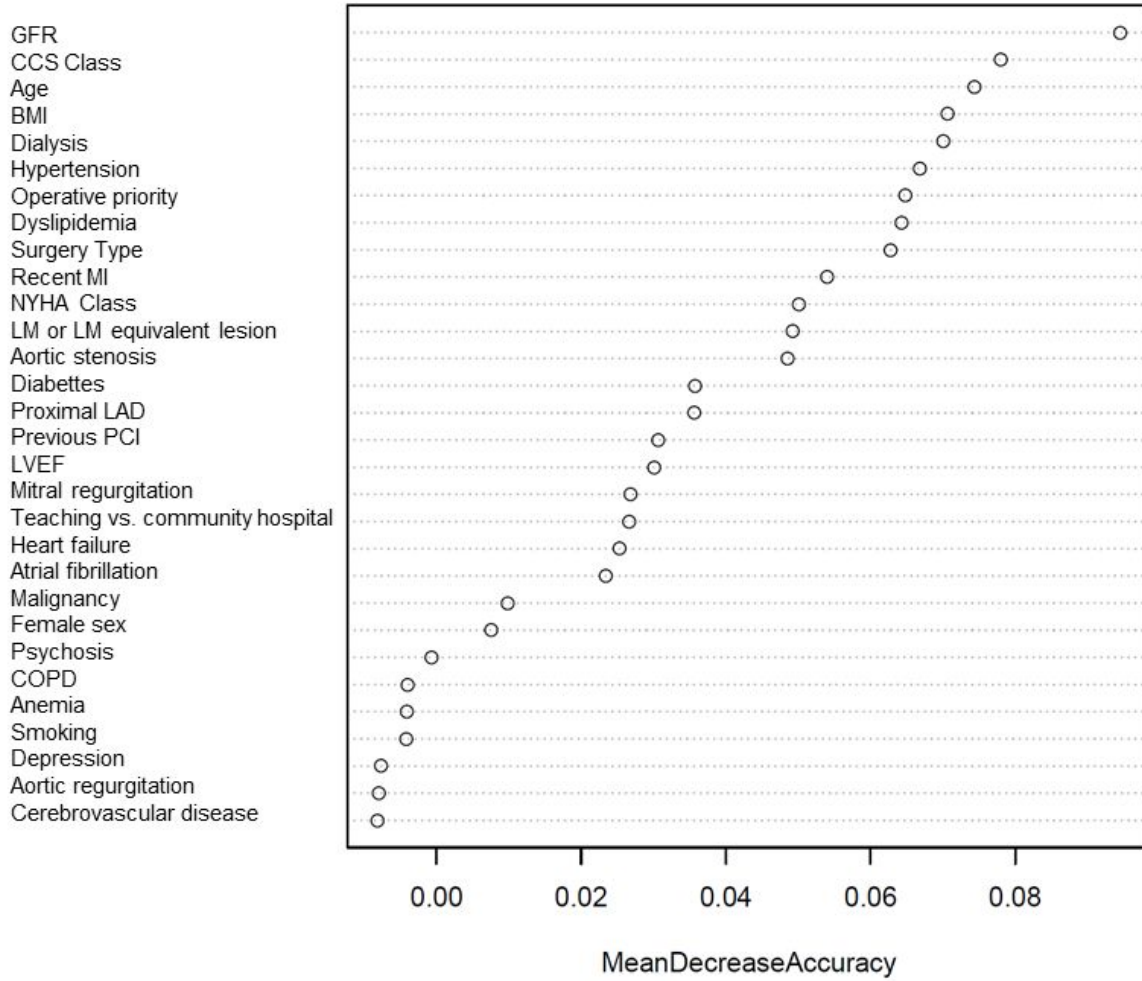

**Supplemental Table S1.** Multivariable predictors of waitlist death in the model that imputed unknown operative priority.

| Variable                           | Model $\beta$ -Coefficient | Wald Chi-Square | P-value |
|------------------------------------|----------------------------|-----------------|---------|
| <b>Demographics</b>                |                            |                 |         |
| Age, yr                            | 0.0309                     | 24.2855         | <.0001  |
| Female sex                         | 0.0421                     | 0.0932          | 0.7602  |
| <b>Comorbidities</b>               |                            |                 |         |
| CCS classification                 |                            |                 |         |
| 0                                  | NA                         | NA              | NA      |
| 1                                  | -0.0688                    | 0.0877          | 0.7671  |
| 2                                  | -0.0660                    | 0.0887          | 0.7659  |
| 3                                  | -0.1050                    | 0.2008          | 0.6541  |
| 4                                  | 0.4066                     | 1.5561          | 0.2122  |
| Low-risk ACS                       | -0.2022                    | 0.6820          | 0.4089  |
| Intermediate-risk ACS              | 0.0600                     | 0.0663          | 0.7968  |
| High-risk ACS                      | 0.6361                     | 5.5885          | 0.0181  |
| LM or LM equivalent disease        | 0.2378                     | 2.3020          | 0.1292  |
| Left ventricular ejection fraction |                            |                 |         |
| $\geq 50\%$                        | NA                         | NA              | NA      |
| 35-49%                             | 0.7009                     | 21.4972         | <.0001  |
| 20-35%                             | 0.9267                     | 24.5732         | <.0001  |
| < 20%                              | 1.0397                     | 9.2154          | 0.0024  |
| Heart failure                      | 0.5625                     | 15.4619         | <.0001  |
| Atrial fibrillation                | -0.5342                    | 11.0024         | 0.0009  |
| Dialysis                           | 1.3167                     | 47.0915         | <.0001  |
| Psychosis                          | 1.6746                     | 8.0561          | 0.0045  |
| <b>Operative characteristics</b>   |                            |                 |         |
| Surgery type                       |                            |                 |         |
| CABG                               | NA                         | NA              | NA      |
| Valve                              | 0.9931                     | 22.7598         | <.0001  |
| CABG + Valve                       | 1.0354                     | 34.4080         | <.0001  |
| Thoracic Aorta                     | 0.7872                     | 3.5428          | 0.0598  |

**Abbreviations:** OR = odds ratio; CI = confidence interval; CCS = Canadian Cardiovascular Society; LM = left main coronary artery; CABG = coronary artery bypass grafting
